# Supplementary material
Source: Elsevier journal article supplement (https://www.sciencedirect.com/science/article/pii/S0300289620303823)
Supplement: mmc1 [file S0300289620303823:mmc1.docx]

**Supplementary material**

**
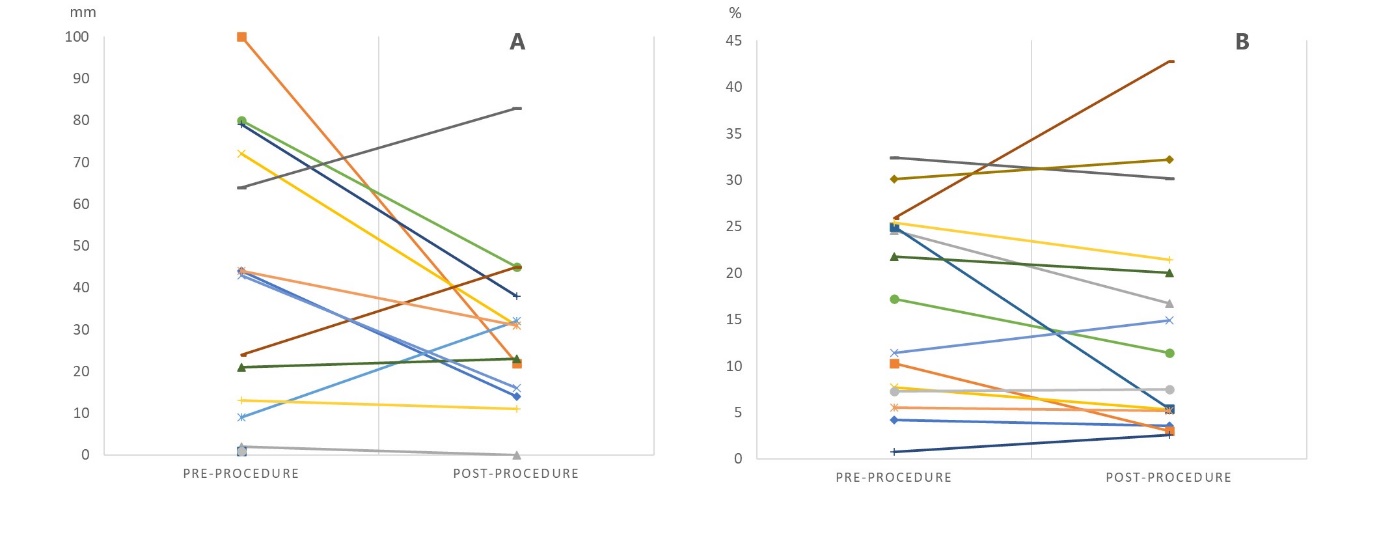
**

Panel A: Changes in the 100 mm visual analogue scale (VAS) score for dyspnoea before (left) and after (right) pleural intervention. Panel B: Changes in the percent of waking time per day spent in non sedentary activity before (left) and after (right) pleural intervention.

Table S: Sensewear® armband data during the peri-drainage period. Data expressed as median (IQR)

| **Variable** | **Pre-drainage** | **Post-drainage** |
| --- | --- | --- |
| Number of days armband worn | 6 (5-7) | 4.6 (2.5 – 6.75) |
| On body time/day hour | 12.4 (10 - 14) | 11.2 (8 - 12.5) |
| Total Energy Expenditure/day KJ | 7558 (6146 - 9700) | 7039 (4300 - 9292) |
| Steps/day | 785 (53 - 2410) | 244 (30 - 1380) |
| Percentage of the waking time spent per day in activities worth 1.5 MET or more (non-sedentary) | 14.3 (6 - 25) | 13.1 (4 - 21) |
| Average MET during waking time | 1.2 (1.02 – 1.37) | 1.15 (1 - 1.3) |

MET: metabolic equivalent of tasks

Figure 1
